# Supplementary material
Source: PubMed Central journal article supplement (PMC5605419)
Supplement: NIHMS878782-supplement-Supp_info.pdf [file NIHMS878782-supplement-Supp_info.pdf]

Supplemental Table 1: Cause of death categories for cases where DILI had only a contributory role or no role in the death or need for liver transplant.

| Cause of death                                                           |
|--------------------------------------------------------------------------|
| Cardiovascular disease                                                   |
| Cerebrovascular disease                                                  |
| Malignant neoplasm                                                       |
| Chronic respiratory disease                                              |
| Acute respiratory disease                                                |
| Influenza & pneumonia                                                    |
| Neurologic disorders                                                     |
| Alzheimer's disease/Dementia                                             |
| Accidental (unintentional injuries)                                      |
| Intentional self-harm (suicide)                                          |
| Diabetes, complications of                                               |
| Renal disease                                                            |
| Septicemia                                                               |
| Multi-organ failure (MOF)/Systemic inflammatory response syndrome (SIRS) |
| Non-DILI liver related death                                             |
| DRESS/Stevens Johnson                                                    |
| Unknown or indeterminate                                                 |
| Other (details specified by committee)                                   |

Supplemental Tables 2-5: Primary implicated agents and frequencies for primary role cases categorized by course of liver failure.

---

**Supplemental Table 2: Primary role**

| <b><u>Acute liver failure</u></b> | <b>#</b>  | <b>%</b>   |
|-----------------------------------|-----------|------------|
| Herbal/Dietary Supplement         | 9         | 18         |
| ISONIAZID                         | 9         | 18         |
| NITROFURANTOIN                    | 4         | 8          |
| AMOXICILLIN W/CLAVULANIC ACID     | 2         | 4          |
| AZITHROMYCIN                      | 2         | 4          |
| ATRIPLA                           | 1         | 2          |
| BUPROPION                         | 1         | 2          |
| CARBOPLATIN                       | 1         | 2          |
| CIPROFLOXACIN                     | 1         | 2          |
| EPHEDRINE                         | 1         | 2          |
| ERYTHROMYCIN W/SULFISOXAZOLE      | 1         | 2          |
| HYDRALAZINE                       | 1         | 2          |
| INTERFERON BETA-1A                | 1         | 2          |
| IPILIMUMAB                        | 1         | 2          |
| LEFLUNOMIDE                       | 1         | 2          |
| LENALIDOMIDE                      | 1         | 2          |
| LEVOFLOXACIN                      | 1         | 2          |
| LISINAPRIL/HYDROCHLOROTHIAZIDE    | 1         | 2          |
| MOXIFLOXACIN                      | 1         | 2          |
| OXALIPLATIN                       | 1         | 2          |
| PHENTERMINE                       | 1         | 2          |
| PHENYTOIN                         | 1         | 2          |
| PROMETHAZINE                      | 1         | 2          |
| PROPYLTHIOURACIL                  | 1         | 2          |
| SULFAMETHOXAZOLE                  | 1         | 2          |
| TRIMETHOPRIM                      | 1         | 2          |
| TELITHROMYCIN                     | 1         | 2          |
| TERBINAFINE                       | 1         | 2          |
| TOPIRAMATE                        | 1         | 2          |
| VALPROIC ACID                     | 1         | 2          |
| <b>Total</b>                      | <b>50</b> | <b>100</b> |

**Supplemental Table 3: Primary role**

| <b><u>Acute on chronic liver failure</u></b> | <b>#</b> | <b>%</b>   |
|----------------------------------------------|----------|------------|
| HERBAL/DIETARY SUPPLEMENT                    | 2        | 40         |
| CEFOTAXIME                                   | 1        | 20         |
| EZETIMIBE W/SIMVASTATIN                      | 1        | 20         |
| NICOTINIC ACID                               | 1        | 20         |
| <b>Total</b>                                 | <b>5</b> | <b>100</b> |

**Supplemental Table 4: Primary role**

| <b>Chronic liver failure</b> | <b>#</b> | <b>%</b>   |
|------------------------------|----------|------------|
| HERBAL/DIETARY SUPPLEMENT    | 3        | 33         |
| AMIODARONE                   | 1        | 11         |
| ATAZANAVIR                   | 1        | 11         |
| CIPROFLOXACIN                | 1        | 11         |
| FENOFIBRATE                  | 1        | 11         |
| METHOTREXATE                 | 1        | 11         |
| MOXIFLOXACIN                 | 1        | 11         |
| <b>Total</b>                 | <b>9</b> | <b>100</b> |

**Supplemental Table 5: Primary role**

| <b>Rapid cholestatic liver failure</b> | <b>#</b> | <b>%</b>   |
|----------------------------------------|----------|------------|
| CEFALEXIN                              | 1        | 25         |
| DOXYCYCLINE                            | 1        | 25         |
| LEVOFLOXACIN                           | 1        | 25         |
| NITROFURANTOIN                         | 1        | 25         |
| <b>Total</b>                           | <b>4</b> | <b>100</b> |

Supplemental Table 6: Cox regression analysis for associations between Hy's Law, nR Hy's Law, MELD at DILI onset with early DILI fatalities (<26 weeks) by acute liver failure or acute on chronic liver failure.

| Variable                 | Hazard ratio | 95% CI      | p-value | C-statistic | 95% CI     |
|--------------------------|--------------|-------------|---------|-------------|------------|
| Hy's Law <sup>Δ</sup>    | 2.2          | 1.3, 3.7    | <0.01   | 0.60        | 0.53, 0.67 |
| nR Hy's Law <sup>◊</sup> | 6.2          | 3.4, 11.1   | <0.01   | 0.73        | 0.67, 0.78 |
| MELD score               | 1.2          | 1.1, 1.2    | <0.01   | 0.87        | 0.82, 0.92 |
| MELD > 14                | 12.1         | 2.9, 49.9   | <0.01   | 0.66        | 0.62, 0.69 |
| MELD > 19                | 35.8         | 11.1, 115.2 | <0.01   | 0.83        | 0.79, 0.86 |
| MELD > 24                | 10.6         | 5.9, 18.9   | <0.01   | 0.74        | 0.67, 0.80 |
| MELD > 29                | 13.9         | 7.7, 25.1   | <0.01   | 0.67        | 0.61, 0.74 |

<sup>Δ</sup> bilirubin  $\geq$  2.5 mg/dL, ALT > 3x ULN and Alk P < 2x ULN at presentation

<sup>◊</sup> bilirubin  $\geq$  2.5 mg/dL, and R-ratio > 5 at presentation. (AST is substituted for ALT if AST yields greater R-ratio)

CI = Confidence interval
